# Supplementary material for: Severe SARS-CoV-2 placenta infection can impact neonatal outcome in the absence of vertical transmission
Source: JCI journal article supplement (doi:10.1172/jci145427), 2021-01-26

## SUPPLEMENTARY MATERIAL

### **Severe SARS-CoV-2 placenta infection can impact neonatal outcome in the absence of vertical transmission.**

Fulvia Milena Cribiù<sup>1#</sup>, Roberta Erra<sup>1#</sup>, Lorenza Pagni<sup>1#</sup>, Carlota Rubio-Perez<sup>2</sup>, Lidia Alonso<sup>2</sup>, Sara Simonetti<sup>2</sup>, Giorgio Alberto Croci<sup>1</sup>, Garazi Serna<sup>2</sup>, Andrea Ronchi<sup>1</sup>, Carlo Pietrasanta<sup>1</sup>, Giovanna Lunghi<sup>1</sup>, Anna Maria Fagnani<sup>1</sup>, Maria Piñana<sup>3</sup>, Matthias Matter<sup>4</sup>, Alexandar Tzankov<sup>4</sup>, Luigi Terracciano<sup>4</sup>, Andres Anton<sup>3</sup>, Enrico Ferrazzi<sup>1</sup>, Stefano Ferrero<sup>1</sup>, Enrico Iurlaro<sup>1</sup>, Joan Seoane<sup>2\*</sup>, Paolo Nuciforo<sup>2\*</sup>

*1 Fondazione IRCCS Ca' Granda Ospedale Maggiore Policlinico, Milan, Italy.*

*2 Vall d'Hebron Institute of Oncology, Barcelona, Spain.*

*3 Vall d'Hebron University Hospital, Vall d'Hebron Institute of Research, Barcelona, Spain*

*4 University of Basel, Basel.*

# Drs. Cribiù, Erra, and Pagni contributed equally.

\*Drs. Seoane and Nuciforo contributed equally.

The authors have declared that no conflict of interest exists.

#### **Corresponding authors:**

**Paolo Nuciforo, MD PhD**

pnuciforo@vhio.net

**Joan Seoane, PhD**

jseoane@vhio.net

Vall d'Hebron Institute of Oncology (VHIO)

CENTRE CELLEX

C/ Natzaret, 115-117

08035 Barcelona, SPAIN

## SUPPLEMENTARY METHODS

*Patient data.* Pregnant women with COVID-19 delivering between March 12<sup>th</sup> and April 23<sup>rd</sup> 2020 at Fondazione IRCCS Ca' Granda – Ospedale Maggiore Policlinico (Milan, Italy) were retrospectively identified via the electronic health record. Controls were women undergoing third trimester delivery in the same period with clinically indicated placental pathology examination (at physician's judgment) but tested negative for SARS-CoV-2 infection by nasopharyngeal swab PCR. Formalin-fixed paraffin-embedded (FFPE) placental tissue samples were collected from all women included in the study. Histopathological evaluation was performed by two expert pathologists (FMC and GAC) according to the Amsterdam Placental Workshop Group Consensus Guidelines (1). Lung samples from SARS-CoV-2 positive patients were collected post mortem at the Department of Pathology, University of Basel (Switzerland).

*RT-PCR.* Quantitative RT-PCR for SARS-CoV-2 on placenta and lung tissue samples were performed using two different assays. Allplex™ 2019-nCoV Assay (Seegene Inc, South Korea), which targets E, RdRp and N genes, and TaqMan™ 2019-nCoV Assay Kit-v2 (Thermofisher Scientific, USA), which targets N, ORF1ab and S genes. According to the manufacturer's instructions, samples with two or more positive targets were considered as SARS-CoV-2 positive. All samples were equally classified by the 2 assays. Only results from the TaqMan™ 2019-nCoV Assay Kit-v2 are shown in Table S3 and S4.

*In situ analyses.* Viral RNA was visualized in FFPE tissue sections using the RNAscope® (Advanced Cell Diagnostics USA; Newark, CA) *in situ* hybridization assay as previously described (2). Results were expressed in density values (number of signals per mm<sup>2</sup> of tissue). Apoptosis was analyzed by immunohistochemistry (IHC) using the anti-cleaved caspase-3 (Asp175) rabbit polyclonal antibody from Cell Signaling Technologies (cat#9661) and quantified by image analysis.

*Gene expression.* RNA expression profiling through Nanostring was performed by Pangea Oncology, with an in-house built panel of 90 genes containing the genes specified in the three gene signatures of interest: cytotoxic cells, macrophages and the IFN $\gamma$  signature defined by Ayers and colleagues (Table S5) (3). We normalized Nanostring counts with NSolver© software. We adjusted for background noise thresholding by the maximum of counts of the negative controls and the geometric mean of the counts of the positive controls. Next, expression counts were log2

transformed. Enrichment score of the three aforementioned gene signatures was calculated according to the following formula:

$$\frac{patientZ_i - \min(patientsZ)}{\max(patientsZ) - \min(patientsZ)}$$

where  $\mu$  refers to average  $\sigma$  to standard deviation and *patientsZ* is defined as follows:

$$\frac{\sum_{n-i}^i \frac{gene_i - \mu(gene\ across\ patients)}{\sigma(gene\ across\ patients)}}{n\ (signature\ genes)}$$

Samples were aggregated according to the enrichment score of the three signatures using the ward method, through Scipy cluster package (4). The number of clusters for downstream analyses was set to three.

*Statistics.* Statistical analyses were carried out using SPSS statistics 24 software. Comparison of continuous variables was carried out with the non-parametric Mann-Whitney U test. For analysis of categorical variables, we used the chi-square test or Fisher's exact test. For gene expression, all statistical analysis, including Mann-Whitney test and P-value adjustment (False Discovery Rate Benjamini & Hochberg method) were performed through Python SciPy library (4). Statistical significance was accepted at the conventional two-sided  $P < 0.05$  thresholds.

## **SUPPLEMENTAL REFERENCES.**

1. Khong TY, et al. Sampling and definitions of placental lesions Amsterdam placental workshop group consensus statement. Arch Pathol Lab Med. 2016;140(7):698-713.
2. Serna G, et al. Fusobacterium nucleatum persistence and risk of recurrence after preoperative treatment in locally advanced rectal cancer. Ann Oncol. 2020;31(10):1366-1375.
3. Ayers M, et al. IFN- $\gamma$ -related mRNA profile predicts clinical response to PD-1 blockade. J Clin Invest. 2017;127(8):2930-2940.
4. Virtanen P, et al. SciPy 1.0: fundamental algorithms for scientific computing in Python. Nat Methods. 2020;17(3):261-272.

**Table S1. Summary of placental histopathology in COVID+ and COVID- cohorts.**

| Feature                                          | Patient 1 | COVID+<br>(n=21) | COVID-<br>(n=16) | Odds ratio vs<br>COVID- | P-value vs<br>COVID- |
|--------------------------------------------------|-----------|------------------|------------------|-------------------------|----------------------|
| <b>Fetal vascular malperfusion (FVM), any</b>    | 0         | 4 (19)           | 2 (12)           | 1.89                    | 0.68                 |
| <i>Delayed villous maturation (DVM)</i>          | 0         | 1 (5)            | 4 (25)           | 0.19                    | 0.14                 |
| <i>Chorangiomas</i>                              | 0         | 2 (9)            | 4 (25)           | 0.37                    | 0.37                 |
| <b>Maternal Vascular malperfusion (MVM), any</b> | 1         | 6 (29)           | 2 (12)           | 3.20                    | 0.42                 |
| Central villous infarction                       | 1         | 1 (5)            | 0 (0)            | ND                      | 1                    |
| Peripheral villous infarction                    | 1         | 1 (5)            | 0 (0)            | ND                      | 1                    |
| <b>Acute inflammatory pathology</b>              |           |                  |                  |                         |                      |
| <i>Fetal inflammatory response stage 2</i>       | 0         | 0 (0)            | 3 (19)           | 0                       | 0.07                 |
| <i>Maternal inflammatory response stage 2</i>    | 0         | 2 (9)            | 4 (25)           | 0.27                    | 0.37                 |
| <b>Chronic inflammatory pathology</b>            |           |                  |                  |                         |                      |
| <i>Villitis, high grade</i>                      | 1         | 1 (5)            | 0 (0)            | ND                      | 1                    |
| <i>Villitis, low grade</i>                       | 0         | 3 (14)           | 3 (19)           | 0.83                    | 1                    |
| <b>Other placental findings</b>                  |           |                  |                  |                         |                      |
| <i>increased perivillous fibrin</i>              | 1         | 4 (19)           | 1 (6)            | 4.00                    | 0.36                 |
| <i>MPFD with trophoblast damage</i>              | 1         | 1 (5)            | 0 (0)            | ND                      | 1                    |
| <i>perivillous calcification</i>                 | 1         | 8 (38)           | 6 (37)           | 0.97                    | 1                    |
| <i>intravillous calcification</i>                | 1         | 3 (14)           | 4 (25)           | 0.56                    | 0.67                 |

MPFD, massive perivillous fibrin deposition. ND, not determined.

**Table S2. Characteristics of maternal and neonatal outcomes in women with positive nasopharyngeal swab (n=21) according to SARS-CoV-2 placenta status.**

|                                      |                    | SARS-CoV-2 PCR   |                  | P   |
|--------------------------------------|--------------------|------------------|------------------|-----|
|                                      |                    | NEG              | POS              |     |
| BMI                                  |                    | 25 (24-33)       | 27.5 (23-30)     | .84 |
| Gestational age at diagnosis         |                    | 36 (32-39)       | 37 (37-38)       | .92 |
| Gestational age at delivery          |                    | 38 (36-40)       | 38 (37-39)       | .47 |
| Ethnicity                            | Caucasian          | 6                | 5                | .20 |
|                                      | Asian              | 0                | 3                |     |
|                                      | Hispanic           | 5                | 2                |     |
| Indication for nasopharyngeal swab   | Screening          | 5                | 4                | .57 |
|                                      | Signs and symptoms | 6                | 6                |     |
| Sign and symptoms at admission       | No                 | 5                | 4                | .57 |
|                                      | Yes                | 6                | 6                |     |
| Complications during hospitalization | No                 | 8                | 7                | .63 |
|                                      | Yes                | 3                | 3                |     |
| Pregnancy complications              | No                 | 7                | 5                | .42 |
|                                      | Yes                | 4                | 5                |     |
| Fetal complications                  | No                 | 11               | 8                | .21 |
|                                      | Yes                | 0                | 2                |     |
| Premature delivery                   | No                 | 7                | 8                | .37 |
|                                      | Yes                | 4                | 2                |     |
| Mode of delivery                     | Vaginal            | 8                | 3                | .09 |
|                                      | Cesarean           | 3                | 6                |     |
| Labour                               | Spontaneous        | 5                | 0                | 0.1 |
|                                      | Induction          | 4                | 4                |     |
| Type of caesarean section            | Elective           | 1                | 3                | 1   |
|                                      | Emergency          | 2                | 3                |     |
| APGAR 1                              | 1                  | 0                | 1                | .24 |
|                                      | 8                  | 2                | 0                |     |
|                                      | 9                  | 9                | 8                |     |
| APGAR 5                              | 4                  | 0                | 1                | .41 |
|                                      | 8                  | 1                | 0                |     |
|                                      | 9                  | 1                | 0                |     |
|                                      | 10                 | 9                | 8                |     |
| Placental weight                     |                    | 480 (390-504)    | 502,5 (440-580)  | .39 |
| Neonatal weight                      |                    | 3140 (2500-3635) | 2990 (2770-3200) | .46 |
| pH                                   |                    | 7.3 (7.30-7.35)  | 7.28 (7.25-7.37) | .77 |

Dichotomous variables were expressed as count and continuous variables as median (interquartile range).

**Table S3. Characteristics of post-mortem lung patients.**

| GEcode                                                                                                                                                                                   | Basic demographics |        |             |              | Hospitalization until death (days) | Intubation | PCR Testing source  |                    | SARS-CoV2         |
|------------------------------------------------------------------------------------------------------------------------------------------------------------------------------------------|--------------------|--------|-------------|--------------|------------------------------------|------------|---------------------|--------------------|-------------------|
|                                                                                                                                                                                          | Age                | Gender | Weight (Kg) | Height (cms) |                                    |            | Nasopharyngeal swab | post mortem tissue | Ct* (N/ORF1/S)    |
| <b>E1469</b>                                                                                                                                                                             | 85                 | M      | 71          | 164          | 5                                  | no         | positive            | positive           | 15.25/17.97/15.38 |
| <b>E1470</b>                                                                                                                                                                             | 95                 | M      | 64          | 166          | 3                                  | no         | positive            | positive           | 16.43/18.89/16.07 |
| <b>E1471</b>                                                                                                                                                                             | 74                 | M      | 91          | 185          | 3                                  | no         | positive            | positive           | 18.17/19.43/16.22 |
| <b>E1473</b>                                                                                                                                                                             | 71                 | M      | 79          | 180          | 0                                  | no         | positive            | positive           | 17.23/18.93.17.25 |
| * qRT-PCR of N/ORF1/S genes cycle threshold (Ct) values from the TaqMan™ 2019-nCoV Assay Kit v2 (ThermoFisher Scientific, USA). Lower cycle thresholds (Ct) indicate higher viral loads. |                    |        |             |              |                                    |            |                     |                    |                   |

**Table S4. Tissue samples used in the study and analyses performed.**

| Patient ID | GEcode | Tissue   | Clinical Class | Tissue Class | Ct (N/ORF1/S) | Signal/mm <sup>2</sup> |
|------------|--------|----------|----------------|--------------|---------------|------------------------|
| 1          | E1501  | PLACENTA |                |              | 13/14.5/14    | 4,2                    |
| 1          | E1503  | PLACENTA |                |              |               | 4,2                    |
| 3          |        | PLACENTA |                |              | 29/30/31      | -0,3                   |
| 24         | E1423  | PLACENTA |                |              | 29/30/31      | 0,3                    |
| 4          |        | PLACENTA |                |              | 30/32/31      | 0,0                    |
| 19         |        | PLACENTA |                |              | 34/32/32      | -0,2                   |
| 27         |        | PLACENTA |                |              | 34/32/32      | 0,0                    |
| 17         |        | PLACENTA |                |              | 30/31/33      | 0,1                    |
| 8          |        | PLACENTA |                |              | 34/34/34      | 0,0                    |
| 9          | E1479  | PLACENTA |                |              | 34/32/35      | -0,2                   |
| 18         | E1493  | PLACENTA |                |              | 34/35/36      | 0,0                    |
| 2          | E1415  | PLACENTA |                |              | 40/40/40      | -0,3                   |
| 6          | E1485  | PLACENTA |                |              | 34/40/40      | -0,2                   |
| 7          |        | PLACENTA |                |              | 40/40/40      | -0,3                   |
| 10         | E1416  | PLACENTA |                |              | 40/40/40      | -0,3                   |
| 11         | E1481  | PLACENTA |                |              | 40/40/40      | -0,4                   |
| 13         |        | PLACENTA |                |              | 40/40/40      | 0,1                    |
| 14         |        | PLACENTA |                |              | 40/40/40      | 0,0                    |
| 16         |        | PLACENTA |                |              | 40/40/40      | -0,1                   |
| 21         |        | PLACENTA |                |              | 40/40/40      | -0,1                   |
| 20         |        | PLACENTA |                |              |               | 0,0                    |
| 22         |        | PLACENTA |                |              |               | 0,0                    |
| 5          | E1414  | PLACENTA |                |              | 40/40/40      | -0,1                   |
| 23         |        | PLACENTA |                |              | 40/40/40      | 0,7                    |
| 15         |        | PLACENTA |                |              |               | -0,7                   |
| 25         | E1424  | PLACENTA |                |              |               | -0,3                   |
| 28         | E1425  | PLACENTA |                |              |               | -0,2                   |
| 31         | E1427  | PLACENTA |                |              |               | 0,2                    |
| 32         | E1496  | PLACENTA |                |              |               | -0,2                   |
| 35         | E1428  | PLACENTA |                |              |               | 0,1                    |
| 37         | E1500  | PLACENTA |                |              |               | 0,0                    |
| 38         | E1429  | PLACENTA |                |              |               | 0,0                    |
| 26         |        | PLACENTA |                |              |               |                        |
| 30         |        | PLACENTA |                |              |               |                        |
| 33         |        | PLACENTA |                |              |               |                        |
| 34         |        | PLACENTA |                |              |               |                        |
| 36         |        | PLACENTA |                |              |               |                        |
| 39         |        | PLACENTA |                |              |               |                        |
| 40         | E1469  | LUNG     |                |              | 15/18/15      | 3,7                    |
| 41         | E1470  | LUNG     |                |              | 16/19/16      |                        |
| 42         | E1471  | LUNG     |                |              | 18/19/16      | 2,8                    |
| 43         | E1473  | LUNG     |                |              | 17/19/17      |                        |

Patient ID: study patient identification number. GEcode: Gene expression code (only for samples undergoing gene expression analysis). Clinical class: dark red, mother with positive nasopharyngeal swab by qRT-PCR; green, mother with negative nasopharyngeal swab by qRT-PCR. Tissue class: black, placentas highly positive by qRT-PCR (Ct below 30 in at least two out of the three target genes analysed) and/or RNA-ISH (density >2 log10); dark grey, placentas weakly positive by qRT-PCR (Ct between 30 and 39) and/or RNA-ISH (density between 1 and 2 log10); light grey, placentas negative by qRT-PCR (Ct ≥40) and/or RNA-ISH (density >1 log10). Ct: qRT-PCR of N/ORF1/S genes cycle threshold (Ct) values from

the TaqMan™ 2019-nCoV Assay Kit v2 (ThermoFisher Scientific, USA). Signal/mm<sup>2</sup>: density of SARS-CoV-2 signals per square mm of tissue by RNA-ISH. Caspase: percentage of activated caspase-3-stained tissue.

**Table S5. List of genes included in the signatures.**

| Gene   | Signature                      |
|--------|--------------------------------|
| CXCL10 | IFNg signature                 |
| CXCL11 | IFNg signature                 |
| CXCL9  | IFNg signature                 |
| IFNg   | IFNg signature                 |
| GZMB   | Cytotoxic cells (NK+CD8 Tcell) |
| CD8A   | Cytotoxic cells (NK+CD8 Tcell) |
| GZMA   | Cytotoxic cells (NK+CD8 Tcell) |
| PRF1   | Cytotoxic cells (NK+CD8 Tcell) |
| CTSK   | Macrophages                    |
| MSR1   | Macrophages                    |
| CCL7   | Macrophages                    |
| CD163  | Macrophages                    |
| CD68   | Macrophages                    |
| CD163  | Macrophages                    |
| CSF1   | Macrophages                    |

## Supplementary Figures

Figure S1. Morphological features of severe injured placenta from Patient 1. The intervillous space of the placental parenchyma is occupied by massive fibrin deposition associated with erythrocytes, cellular debris, neutrophilic granulocytes, lymphocytes and calcification. The syncytiotrophoblast layer of the villi is variably smudged appearing and necrotic; the villi are close together with collapse of the intervillous maternal blood space and necrotic changes, loss of trophoblast nuclear staining, and diffusely ghost villi

Figure S2. SARS-CoV-2 placenta infection and apoptosis. (A) In this figure we show representative images of the virus load by SARS-CoV-2 *in situ* hybridization (red signal) and apoptosis levels by activated caspase-3 immunohistochemistry (brown signal) in the severe injured placenta from Patient 1 (E1501), a clinically positive / PCR negative placenta (E1485), and a clinically positive / PCR positive placenta (E1479). Scale bar: 100um. (B) Correlation between SARS-CoV-2 load and apoptosis by immunohistochemistry in placental tissues. X-axis, SARS-CoV-2 RNA *in situ* hybridization density (log10). Y-axis, % of activated caspase-3-stained area. High levels of apoptosis are induced in two independent samples from patient 1 with high viral load (black dots) but not in samples with undetectable or weakly detectable virus.

Figure S3. SARS-CoV-2 infection in placental and lung tissues. In this figure we show images of the severe injured placenta (E1501) and a post-mortem lung sample (E1469) stained with SARS-CoV-2 and SARS-CoV-2 Sense probes detecting the S gene encoding the spike protein and the antisense strand of the S gene, respectively. Red staining indicates the presence of the virus. A probe recognizing the *dapB* gene was used as negative control (NEG CTRL). Results indicate that despite the high viral load, the virus is not replicating in the placental and lung tissues. Scale bars: Placenta, 5um; Lung, 250um.

Figure S4. (A) Box plots showing the distribution of enrichment scores of Cytotoxic cells (upper left), Macrophages (upper right), IFN $\gamma$  signature (upper middle), CD8A (bottom left), CD68 (bottom right), and CD163 (bottom middle) across sample groups of interest, based on SARS-CoV2 status, depicted below. Results of Mann-Whitney U test are shown as an asterisk if P-value < 0.05 or n.s. otherwise. (B, C) Volcano plot comparing placenta and lung samples (B) and intermediate and low inflammation samples (C). Each dot represents a gene and has been colored according to Mann Whitney U test results and the log2 Fold Change (FC). Significantly over-expressed genes (adjusted P-value < 0.05 and FC > 0) are colored red and significantly under-expressed genes (adjusted P-value < 0.05 and FC < 0) are colored blue; non-significant differentially expressed genes are colored grey. A dashed line represents the significance threshold, adjusted P-value 0.05. The top-5 significantly over- and under- expressed genes have been highlighted.

Figure S1

Histopathological features the placenta from Patient 1

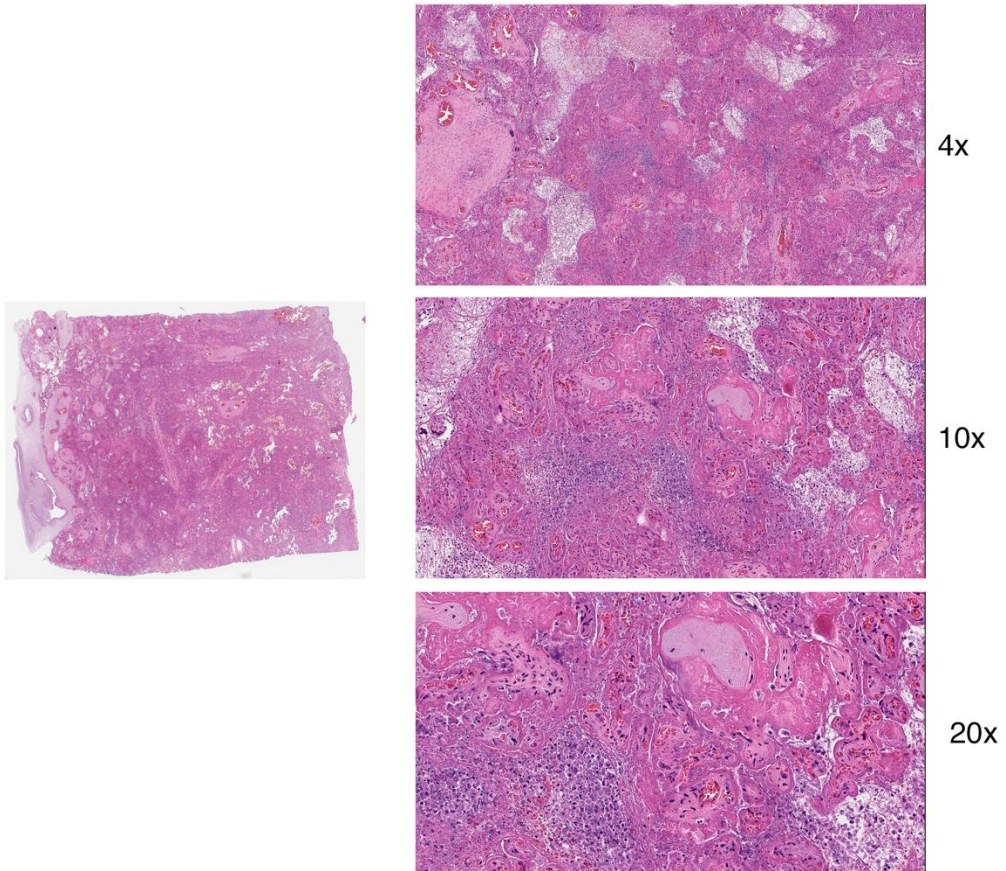

Figure S2

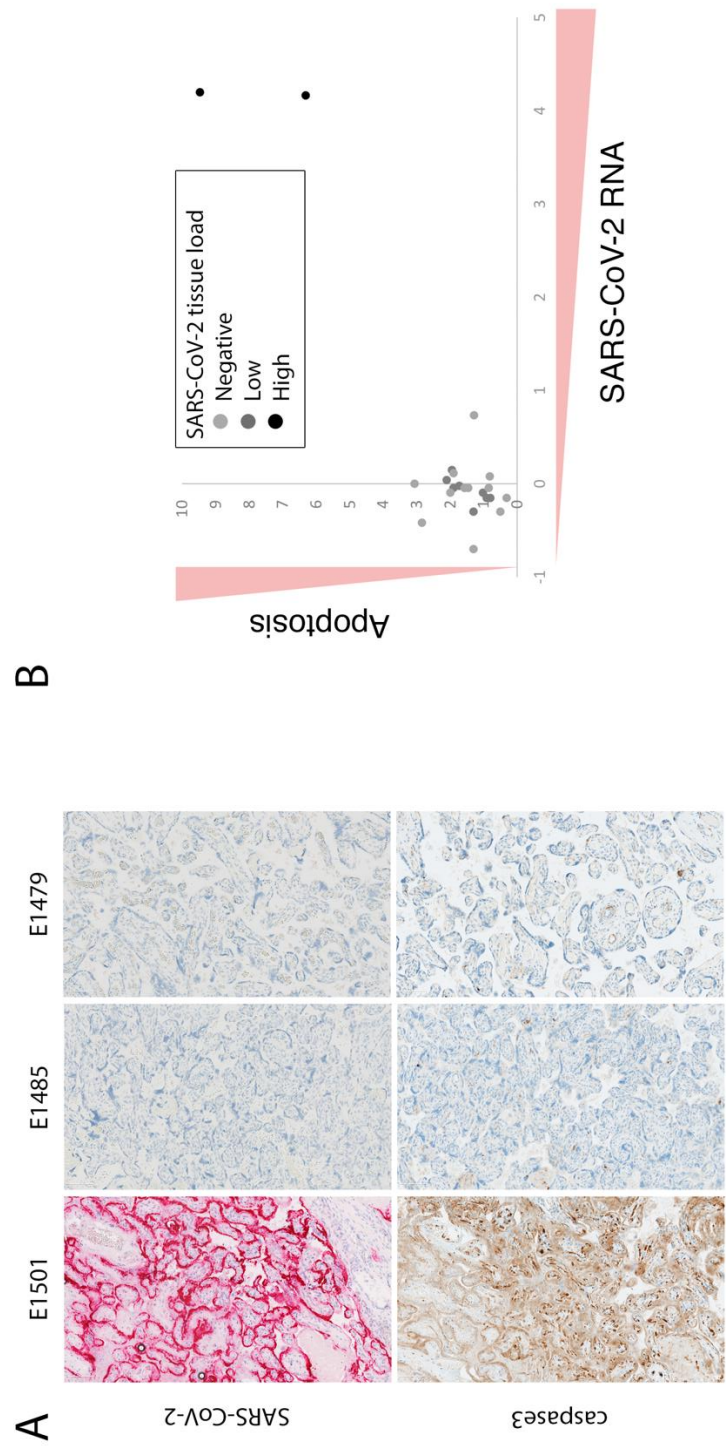

Figure S3

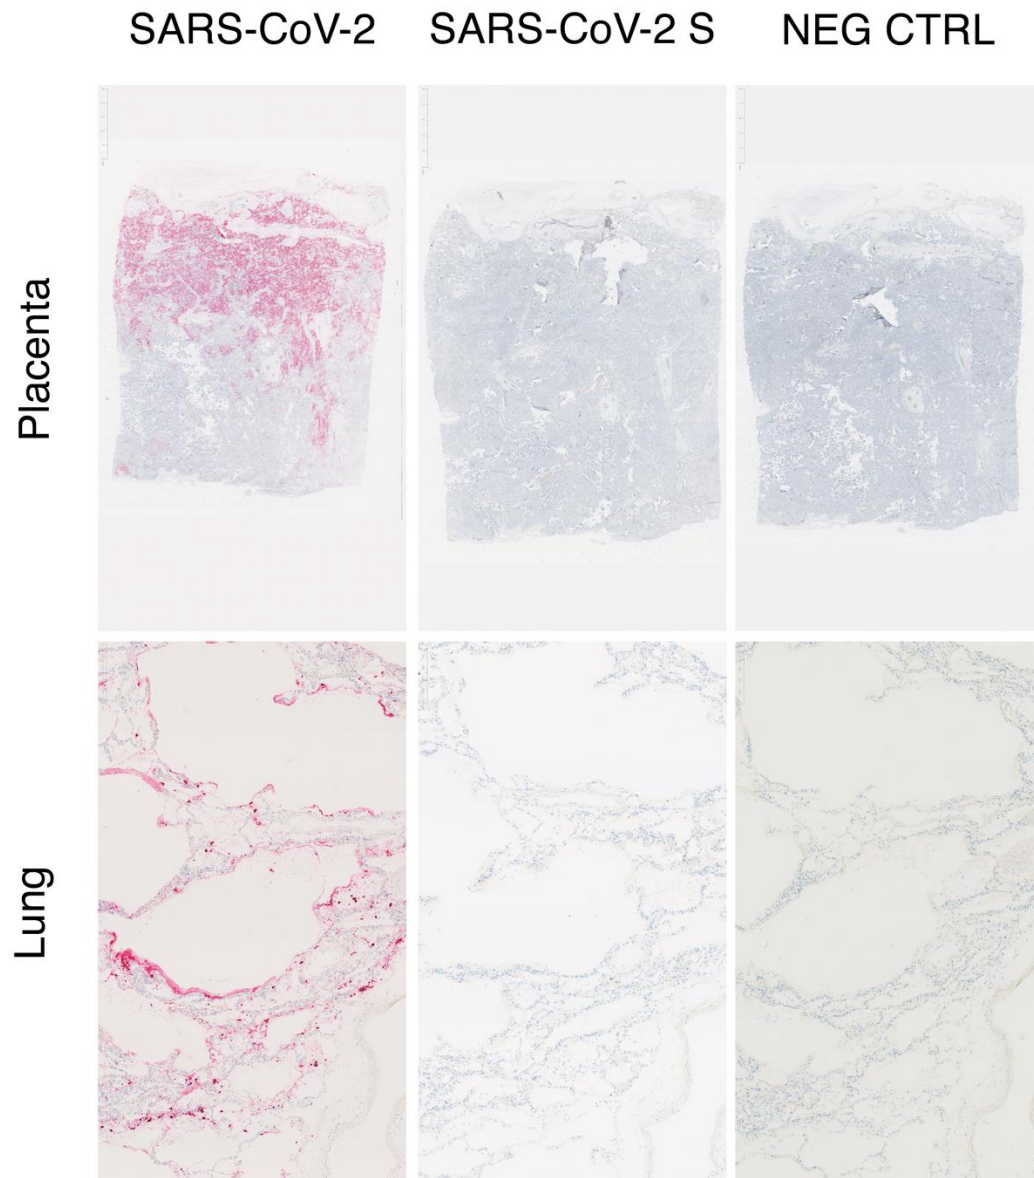

Figure S4

A

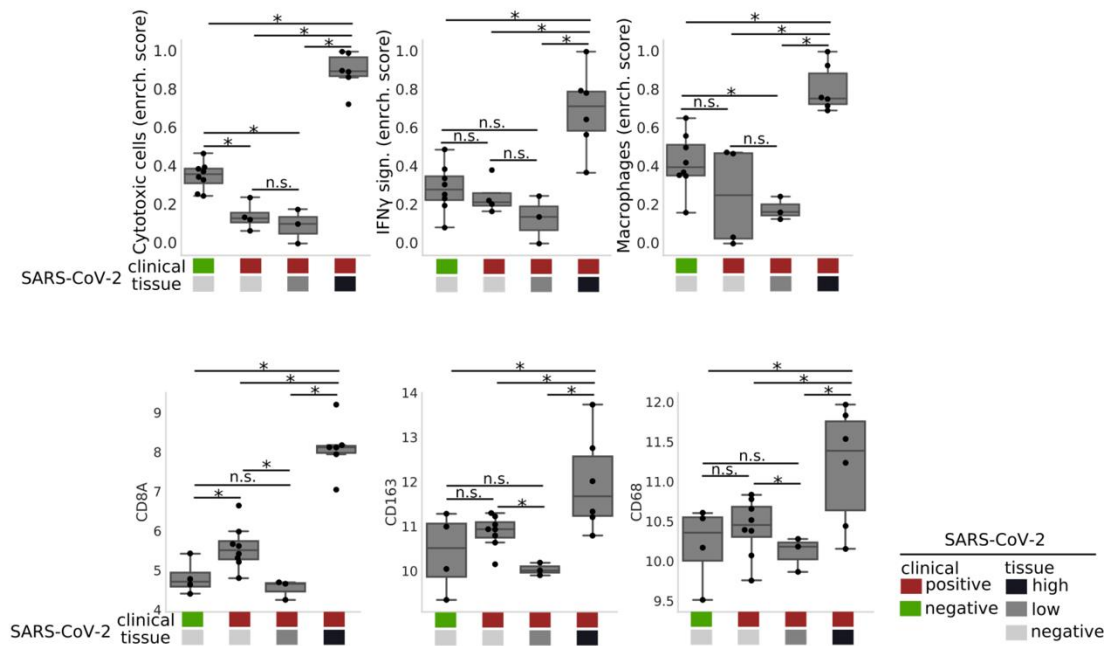

B

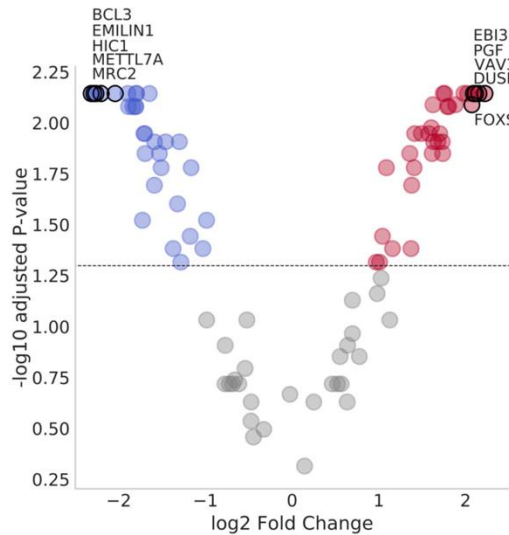

C

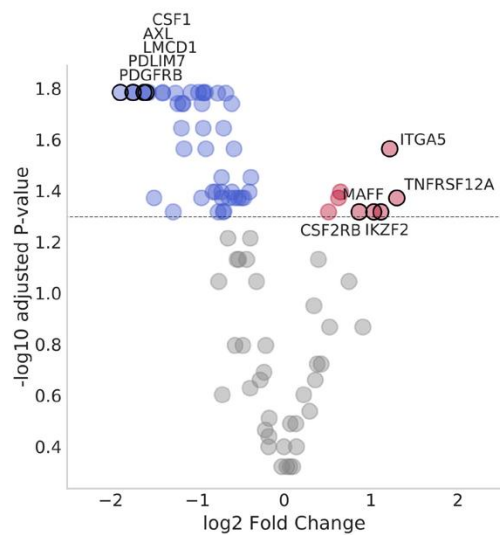

Supplement: sd1 [file 1]
